# Supplementary material
Source: MDPI journal article supplement (https://www.mdpi.com/2227-9040/9/8/235)
Supplement: s1 [file s1]

# Evaluating TiO<sub>2</sub> Photocatalysis Performance in Microtubes on Paper Background by Smartphone: Principles and Application Examples

Xian Liu, Chengxiang Xu, Shiwei Xie \*, Lei Zhu and Xun Wang

School of Urban Construction, Wuhan University of Science and Technology, Wuhan, 430065, China;

Xianliu@wust.edu.cn (X.L.); cx\_xu@sina.com (C.X.); zhulei68@wust.edu.cn (L.Z.);

wangxun@wust.edu.cn (X.W.)

\* Correspondence: xieshiwei@wust.edu.cn; Tel.: +86-13349959086

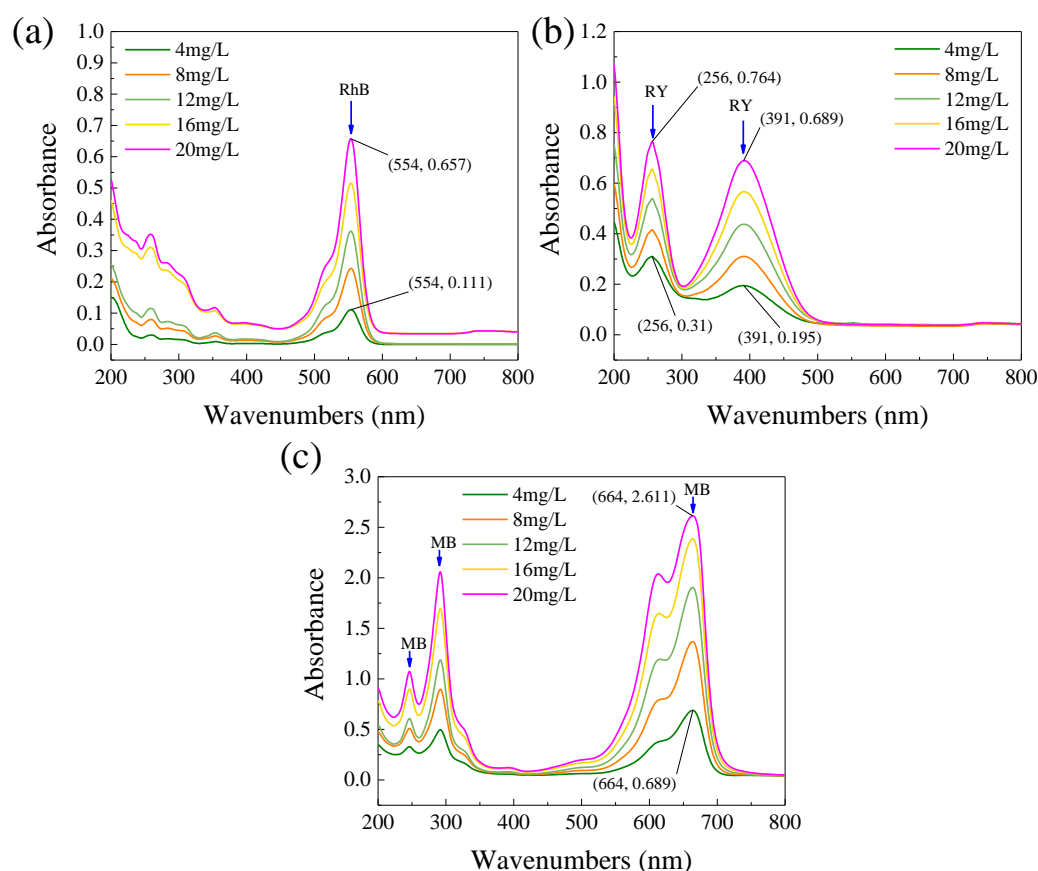

**Figure S1.** UV-Vis spectra of standard concentrations of single dyes: (a) RhB, (b) RY, and (c) MB.

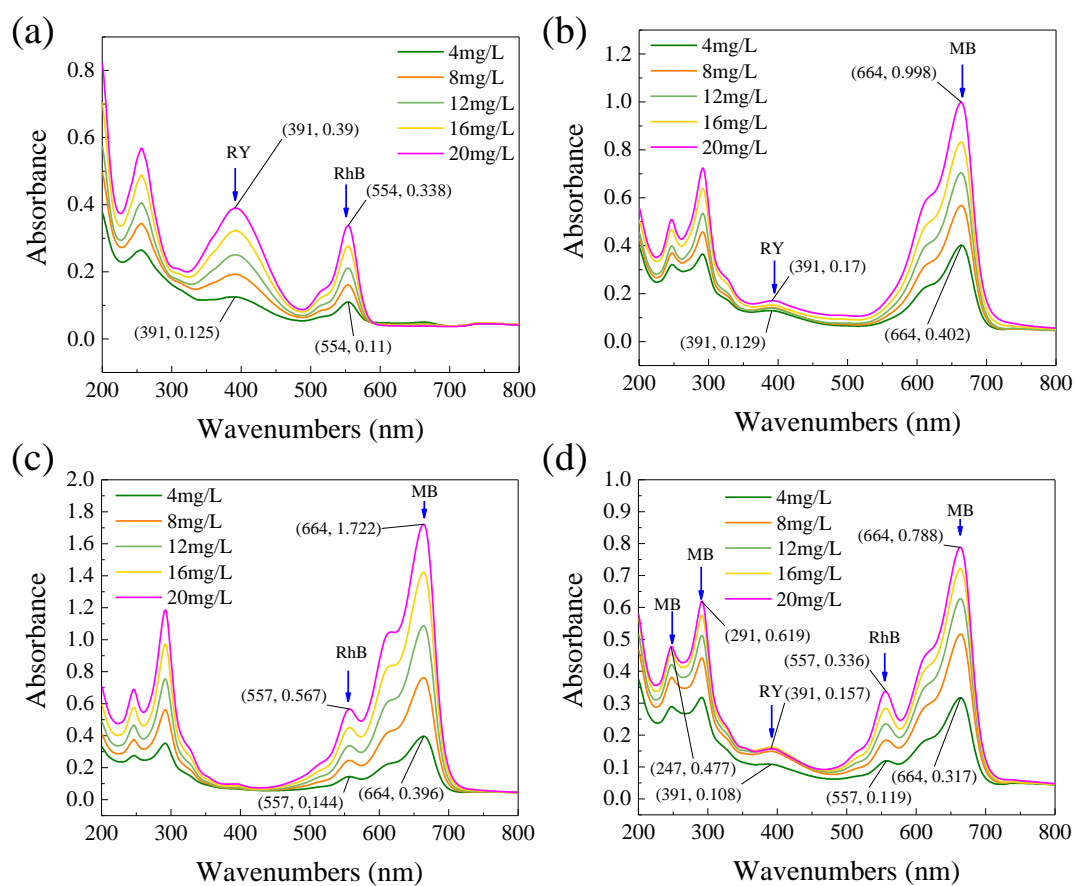

**Figure S2.** UV-Vis spectra of the standard concentrations of the mixed dyes: (a) RhB-RY, (b) RY-MB, (c) RhB-MB, and (d) RhB-RY-MB.
